# Supplementary material
Source: Springer Nature journal article supplement (https://www.springermedizin.de/resource/supplementary/12913_2008_681_MOESM1_ESM.pdf/9535304)
Supplement: MOESM1 [file 9535304]

Random allocation  
Type of postal pre-addressed reply  
envelope

```
graph TD; A[Random allocation  
Type of postal pre-addressed reply  
envelope] --> B[Stamped envelope  
N = 239 (50.1%)]; A --> C[Pre-paid envelope  
N = 238 (49.9%)]; B --> D[Response =  
76  
(31.8%)]; C --> E[Response =  
64  
(26.9%)];
```

Stamped envelope  
N = 239 (50.1%)

Response =  
76  
(31.8%)

Pre-paid envelope  
N = 238 (49.9%)

Response =  
64  
(26.9%)
